# Supplementary material
Source: publisher figshare collection journal article supplement (https://gsajournals.figshare.com/articles/dataset/_/9855590)
Supplement: Supplementary file 1 [file 1]

## Sheet: S1
Table S1. Publications included in analysis of GP algorithm comparisons
Publication Date	Journal	First Author	Species	# MethodsUsed	rrBLUP	GBLUP	Bay LASSO	RF	Weighted-BLUP	Bayes-Cpi (additive & dominance effects)	LT-BayesCpi	BayesA	BayesB	BayesDpi	BayesC	RKHS	Boosted Trees GBM	KNN (lazy learning)	GBLUP-wG	GBLUP-sG	RKHS-wG	RKHS-sG	GS + GWAS	EG-BLUP (Extended Genomic)	SVM	SVM-rbf	kPLSR	LASSO	B-RR	MLP Multilayer Perceptron NN	PNN Probabilistic neural network	PLS (partial LS Regression)	SPLS - Sparse Partial LSR	GRR (generalized RR)	ABC Approx. Bayesian Compuation	kernal RR (KRR)	BGLR (Bay gen lin reg)	EBL - Extended Bay LASSO	GBRT - Gradient boosted Reg Trees	MIX - Bayesian Mixture Reg model	SSVS - Stochastic search variable selection	SLG-BLUP	ALG-BLUB	ENG-BLUP	Bayesian multilevel whole-genome regression model	Elastic Net	BIR2 - bayesian inverse regression with decay model 2	BIR1 - bayesian inverse regression with decay model 1	RBFNN Radial basis function NN
2012-01-15	Crop Science	Heslot N	maize, arabidopsis, barley, wheat	10	1		1	1		1		1				1									1					1								1								1
2016-02-11	G3	Ramstein G	Switchgrass	9		1		1				1	1			1			1	1	1	1
2017-12-11	BMC Genetics	Kwong QB	oil palm	8	1		1	1		1		1	1												1				1
2015-12-01	BMC Genomics	Annicchiarico P	alfalfa	6	1		1	1				1	1												1
2016-06-17	G3	Xavier	soybean	6		1	1					1	1		1	1
2017-01-10	PLOS ONE	Manickavelu A.	wheat	6	1	1		1								1												1																		1
2014-12-07	Theoretical and Applied Genetics	Cros D.	oil palm	5		1	1			1				1															1
2015-02-06	Genetica	Hengde Li	Simulated	5		1							1																													1	1	1
2015-07-22	G3	Thavamanikumar S	wheat	5	1		1						1																			1	1
2015-08-27	PLOS One	Grenier C.	rice	5	1	1	1																					1	1
2016-07-12	Conference Paper	Qiu Z.	maize	5	1			1				1	1		1
2016-11-15	Front. Plant Sci	Tayeh N	pea	5		1						1	1														1	1
2017-01-09	PLOS ONE	Biazzi E.	alfalfa	5	1		1					1	1												1
2017-10-12	Plant Genome	Fiedler J.	durum wheat	5	1	1	1									1													1
2012-01-10	Genetics	Resende MFR	Loblolly pine	4	1		1			1		1
2014-08-25	G3	Cuevas J	maize, wheat	4								1																	1																		1	1
2015-02-17	PLOS Genetics	Spindel J	rice	4	1		1	1								1
2015-03-31	PLOS One	Iwata, H	rice	4	1																						1					1				1
2015-09-08	Theoretical and Applied Genetics	Mirdita V	wheat	4	1					1						1								1
2015-11-12	G3	Ou	simulated	4	1					1		1	1
2016-01-08	Theoretical and Applied Genetics	He. Sang	wheat	4	1					1						1								1
2016-02-12	Front. Plant Sci	Grinberg	Ryegrass	4		1		1									1	1
2017-07-13	The Plant Genome	Znnicchiarico	maise	4	1		1																		1	1
2017-06-29	BMC Plant Biol	Tan B	eucalyptus	4	1	1	1									1
2012-05-08	Theoretical and Applied Genetics	Gonzalez-Camacho	maize	3			1									1																																	1
2012-12-01	Genetics	Jia Y.	pine	3		1				1		1
2014-08-26	PNAS	Xu S.	maize	3		1																						1													1
2014-10-02	Theoretical and Applied Genetics	Bentley Aq	wheat	3	1																							1																		1
2015-03-25	Genetics & Mol Research	Bhering LL	Simulated	3	1	1	1
2015-07-01	Heredity	Ratcliffe B	Interior spruce	3	1					1																								1
2016-02-10	Heredity	Spindel J	Rice	3	1			1															1
2016-07-06	PLOS One	Guozheng Liu	wheat	3	1				1	1
2016-09-06	G3	Hoffstetter A	wheat	3	1		1	1
2017-10-06	Theoretical and Applied Genetics	Michel S.	bread wheat	3	1	1			1
2017-11-14	Theoretical and Applied Genetics	Hassen B.	rice	3		1							1			1
2017-12-20	Theoretical and Applied Genetics	Faville MJ.	ryegrass	3	1	1		1
2014-11-19	BMC Genomics	Beaulieu J	white spruce	2	1																							1
2015-01-07	BMC Genomics	Mirdita V	wheat	2	1					1
2015-01-21	BMC Genomics	El-Dien OG	Interior spruce	2	1																													1
2015-08-01	G3	Technow, F	maize	2								1																																	1
2015-10-01	Genetics	Jiang Y.	wheat, maize	2												1								1
2016-01-16	Plant Science	Isik F	Maritime pine	2		1	1
2016-02-29	BMC Genomics	Gonzalez-Camacho	maize, wheat	2																										1	1
2016-06-29	PLOS One	Technow, F	Simulated	2		1																													1
2018-01-04	G3	Montesinos-Lopez	maize, wheat	2
2017-03-10	Plant Genome	Li Z	barley	2	1
2017-04-14	PLOS ONE	Wang C	simulated	2						1	1
2017-07-01	Theoretical and Applied Genetics	Juliana P	wheat	2		1										1
2017-01-12	Heredity	Bian Y	maize	2		1																	1
2017-01-03	BMC Bioinformatics	Martini J.	simulated, wheat, mouse	2		1																		1
2016-01-19	Theoretical and Applied Genetics	He Sang.	winter wheat	2		1																		1
2017-02-01	G3	Sukumaran	spring wheat	2		1																		1
2016-05-13	Plant Genome	Wolfe M.	cassava	2	1																		1
2018-07-16	Plant Genome	Leplat F	winter barley	2	1	1
2017-10-24	Phytopathology	Liabeuf D.	tomato	2	1		1
2017-11-01	BMC Genomics	Thistlethwaite	douglass-fir	2	1																													1
2017-12-19	G3	Thorwarth P	cauliflower	2		1							1
2014-06-05	BMC Genomics	Jarquin D	soybean	1		1
2014-07-04	BMC Genomics	Wang Y	Ryegrass	1		1
2014-09-01	Genetics	Lehermeier C	maize	1		1
2014-11-12	PLOS One	Lipka A	Switchgrass	1	1
2014-11-19	Heredity	Zhang X	maize	1		1
2014-12-14	BMC Genomics	Cros D	oil palm	1		1
2015-02-06	G3	Lopez-Cruiz M	wheat	1																																	1
2015-05-08	Mol Breed	Bao Y	soybean	1	1
2015-05-12	PLOS One	Blondel M	arabidopsis, barley, maize, rice, wheat, wheat	1		1	1				1			1	1																						1	1	1	1
2015-10-30	Theoretical and Applied Genetics	Zhang J	soybean	1	1
2015-11-11	BMC Genomics	Dario Fe	Ryegrass	1		1
2015-12-16	PLOS One	Wang J	Brassica	1	1
2015-12-23	Hortic. Res	Muranty H.	apple	1						1
2016-01-29	PLOS One	Jan HU	Brassica	1	1
2016-02-16	Theoretical and Applied Genetics	Schmidt M	barley	1	1
2016-06-16	Theoretical and Applied Genetics	Michel S.	wheat	1	1
2016-07-06	G3	Crossa J	wheat	1		1
2016-07-15	Sci Adv.	Lasky JR	sorghum	1		1
2016-07-28	Mol Breed	Ma Y	soybean	1	1
2016-08-16	Theoretical and Applied Genetics	Velu G	wheat	1		1
2016-09-21	Heredity	Wang X	rice	1		1
2016-10-15	Theoretical and Applied Genetics	Gowda M	maize	1	1
2016-11-15	Theoretical and Applied Genetics	Schopp P	maize	1		1
2017-04-28	BMC Genomics	Lenz P	black spruce	1		1
2017-07-01	Theoretical and Applied Genetics	Acosta-Pech	maize	1		1
2017-06-01	Theoretical and Applied Genetics	Liu H	maize	1		1
2016-12-19	Gent Mol Res	Nascimento	simulated	1			1
2017-03-01	G3	Xu S.	rice, human	1	1
2017-01-01	Genetics	Schopp P	maize	1		1
2017-11-28	Plant Genome	Muleta K.	spring wheat	1	1
2017-11-01	G3	Schopp P	maize	1		1
2017-11-08	Front. Plant Sci	Zhang A.	maize	1	1
2017-11-14	Front. Plant Sci	Navarro J.A.	cacao	1	1
2017-12-07	Theoretical and Applied Genetics	Fernandes S	sorghum	1		1
[truncated: 6 more columns]

## Sheet: S2
Table S2. Hyperparameters and values included in the grid search
Algorithm	Hyperparameter	Values Tested
BayesA	degrees of freedom (df)	2, 5, 7, 15
BayesB	degrees of freedom (df)	2, 5, 7, 15
Support Vector Regression linear kernel (SVRlin)	𝐶*	0.01, 0.1, 0.5, 1, 10, 50, 100
SVR polynomial kernel (SVRpoly)	𝐶*	0.01, 0.1, 0.5, 1, 10, 50, 100
	gamma	0.00001, 0.0001, 0.001, 0.01, 0.1, 1, 10
	degrees (n)	2, 3
SVR radial basis function kernel (SVRrbf)	𝐶*	0.01, 0.1, 0.5, 1, 10, 50, 100
	gamma	0.00001, 0.0001, 0.001, 0.01, 0.1, 1, 10
Random Forest (RF)	Max tree depth	3, 5, 10, 20
	Max features/tree	10%, 50%, 100%, square root, log2
	Number of trees	500, 1000
Gradient Tree Boosting (GTB)	Max tree depth	3, 5, 10, 20
	Max features/tree	10%, 50%, 100%, square root, log2
	Number of trees	500, 1000
	Learning rate	0.0001, 0.001, 0.01, 0.1, 1
Artificial Neural Network (ANN)	Activation Function	Rectified Linear Unit (ReLU), sigmoid
	Learning Rate	0.01, 0.001
	Dropout Rate	10%, 50%
	L2 Regularization	0, 0.1, 0.5
	Architecture	10, 50, 100, 10:5, 50:25, 100:50, 10:5:5, 50:25:10, 100:50:25
Convolutional Neural Network (CNN)	Activation Function	Rectified Linear Unit (ReLU), Exponential Linear Unit (ELU), Scaled Exponential Linear Unit (SELU)
	Optimizer	RMSprop, Adam, Nadam
	Learning Rate	1, 0.1, 0.01, 0.001, 0.0001, 0.00001
	Number of kernels	8, 16, 32
	Kernel length	8, 16, 32
	Pooling Size	[1,4], [1, 8], [1, 16]
* The 𝐶 hyperparameter allows for adjusting the degree to which samples inside the support vector margins should be penalized.

## Sheet: S3
Table S3. Results of ANOVA on impact of each hyperparameter for each GP algorithm on model performance for height in each species
Algorithm	Hyperparameter	Species	p.value
Bayes A	degrees of freedom (df)	rice	0.9987
		spruce	0.9953
		maize	0.6335
		switchgrass	0.554
		sorghum	0.4107
		soy	0.9999
Bayes B	degrees of freedom (df)	rice	0.9999
		spruce	0.9871
		maize	0.997
		switchgrass	0.995
		sorghum	0.9835
		soy	0.9996
Support Vector Regresion - linear kernel (SVRlin)	𝐶*	rice	0.99774
		spruce	0.26933
		maize	0.999971
		switchgrass	0.999322
		sorghum	0.999901
		soy	0.000835619
Support Vector Regresion - polynomial kernel (SVRpoly)	𝐶	rice	0.901525
		spruce	0.0368512
		maize	0.225108
		switchgrass	0.225253
		sorghum	7.8814e-05
		soy	n/a
	Degrees (n)	rice	1.48379e-10
		spruce	1.9808e-43
		maize	1.01964e-21
		switchgrass	0.60448
		sorghum	0.0314962
		soy	n/a
	Gamma	rice	0.815552
		spruce	1.13799e-07
		maize	0.272279
		switchgrass	0.275993
		sorghum	0.000313442
		soy	n/a
Support Vector Regresion - radial basis function kernel (SVRrbf)	𝐶	rice	0.577606
		spruce	8.78992e-11
		maize	0.0828561
		switchgrass	0.0340097
		sorghum	0.0134589
		soy	1.4387e-13
	Gamma	rice	0.0393667
		spruce	0.0607325
		maize	0.112536
		switchgrass	1.58183e-05
		sorghum	1.46959e-06
		soy	0.000174431
Random Forest (RF)	Max Depth	rice	0.0004634
		spruce	3.2581e-07
		maize	0.00136688
		switchgrass	0.527392
		sorghum	0.349422
		soy	1.49812e-66
	Max Features	rice	0.326584
		spruce	0.429385
		maize	0.000145761
		switchgrass	0.28183
		sorghum	0.00217605
		soy	1.06141e-09
Gradient Tree Boosting (GTB)	Learning Rate	rice	0
		spruce	0
		maize	0
		switchgrass	4.64424e-165
		sorghum	1.13839e-215
		soy	1.4075e-301
	Max Depth	rice	0.770794
		spruce	5.26021e-05
		maize	0.0644472
		switchgrass	0.318044
		sorghum	0.934107
		soy	7.30739e-29
	Max Features	rice	0.00993919
		spruce	0.948285
		maize	0.000267273
		switchgrass	0.519922
		sorghum	0.0946055
		soy	0.0538867
Artificial Neural Network (ANN)	Activation Function	rice	4.40587e-115
		spruce	1.37437e-123
		maize	2.18306e-22
		switchgrass	2.23034e-146
		sorghum	2.78797e-28
		soy	1.73134e-182
	Architecture	rice	0
		spruce	0
		maize	2.27183e-33
		switchgrass	3.1185e-210
		sorghum	1.30918e-60
		soy	0
	Learning Rate	rice	7.14288e-86
		spruce	4.77747e-19
		maize	6.83908e-21
		switchgrass	5.50801e-162
		sorghum	4.461e-24
		soy	1.48807e-59
	Dropout Rate	rice	0.968525
		spruce	0.846812
		maize	0.758459
		switchgrass	0.744234
		sorghum	0.240933
		soy	0.474444
	L2	rice	4.25644e-223
		spruce	0
		maize	0.00334198
		switchgrass	7.58256e-208
		sorghum	0.00582366
		soy	8.1743e-31
Convolutional Neural Network (CNN)	Activation Function	rice	1.95423e-19
	Optimizer	rice	0.00140384
	Learning Rate	rice	0
	Number of kernels	rice	1.21875e-10
	Kernel length	rice	0.00185696
	Pooling Size	rice	5.23379e-16

## Sheet: S4
Table S4. Standard deviation of model performance across replicates for ANN, seeded ANN, and CNN models for predicting height in each species.
		Seed
	ANN	rrBLUP	BayesB	BL	RF	CNN
maize	0.079001	0.0708445	0.0881633	0.0797399	0.0866984	0.0996241
rice	0.122828	0.0663808	0.0934988	0.0805041	0.0871385	0.0718224
sorghum	0.084175	0.0707024	0.0744992	0.0821223	0.0798367	0.0538205
soy	0.0253726	0.0619085	0.0215037	0.0288011	0.0291415	0.0164641
spruce	0.0777737	0.0552876	0.0617783	0.0915259	0.0536026	0.0297708
switchgrass	0.0994435	0.0753063	0.0851079	0.101987	0.0735778	0.0710544
*Bolded if seeded standard deviation is < ANN standard deviation
ANN: Artificial Neural Network
rrBLUP: ridge regression Best Linear Unbiased Predictor
BL: Bayesian LASSO
RF: Random Forest

## Sheet: S5
Table S5. Full benchmark predictive performance results using all GP algorithms on all species/trait combinations
Species	Trait	Algorithm	r	% Best	Rank
maize	flowering time	BayesA	0.748368	0.977993	5
maize	flowering time	SVR	0.744084	0.972395	7
maize	flowering time	BayesB	0.750526	0.980814	4
maize	flowering time	SVRpoly	0.737096	0.963264	10
maize	flowering time	BL	0.74015	0.967254	8
maize	flowering time	SVRrbf	0.661134	0.863994	18
maize	flowering time	BRR	0.765207	1	1
maize	flowering time	ANN	0.674098	0.880935	17
maize	flowering time	rrBLUP	0.744342	0.972733	6
maize	flowering time	CNN	0.722891	0.9447	12
maize	flowering time	GTB	0.713891	0.932938	15
maize	flowering time	EN5	0.750856	0.981245	3
maize	flowering time	RF	0.708003	0.925244	16
maize	flowering time	EN11	0.752683	0.983633	2
maize	flowering time	ANN_BayesB	0.740086	0.967171	9
maize	flowering time	ANN_BL	0.719694	0.940522	13
maize	flowering time	ANN_RF	0.735357	0.960991	11
maize	flowering time	ANN_rrBLUP	0.715194	0.934641	14
maize	height	BayesA	0.423518	0.945739	9
maize	height	SVRrbf	0.393293	0.878244	12
maize	height	SVR	0.40914	0.913633	11
maize	height	ANN_RF	0.383211	0.855731	16
maize	height	ANN_BayesB	0.386839	0.863833	13
maize	height	BRR	0.43757	0.977119	5
maize	height	BayesB	0.432469	0.965728	7
maize	height	ANN	0.412042	0.920113	10
maize	height	SVRpoly	0.432918	0.966729	6
maize	height	ANN_rrBLUP	0.371494	0.829566	17
maize	height	ANN_BL	0.384375	0.858331	15
maize	height	rrBLUP	0.444475	0.992537	2
maize	height	BL	0.440653	0.984002	3
maize	height	CNN	0.386366	0.862776	14
maize	height	EN5	0.447817	1	1
maize	height	GTB	0.371289	0.829109	18
maize	height	RF	0.426824	0.953122	8
maize	height	EN11	0.438512	0.979222	4
maize	yield	BayesA	0.53153	0.97413	8
maize	yield	ANN	0.507829	0.930694	11
maize	yield	SVR	0.517528	0.948469	9
maize	yield	rrBLUP	0.538353	0.986635	5
maize	yield	BayesB	0.533788	0.978269	7
maize	yield	CNN	0.495529	0.908151	15
maize	yield	SVRpoly	0.534375	0.979345	6
maize	yield	GTB	0.479051	0.877953	17
maize	yield	BL	0.543847	0.996704	2
maize	yield	EN5	0.545646	1	1
maize	yield	SVRrbf	0.502147	0.92028	12
maize	yield	RF	0.516624	0.946812	10
maize	yield	BRR	0.539847	0.989373	4
maize	yield	EN11	0.540916	0.991332	3
maize	yield	ANN_rrBLUP	0.49057	0.899063	16
maize	yield	ANN_BayesB	0.499183	0.914848	13
maize	yield	ANN_BL	0.497072	0.910979	14
maize	yield	ANN_RF	0.463531	0.84951	18
rice	flowering time	BayesA	0.643802	0.991005	2
rice	flowering time	BayesB	0.649646	1	1
rice	flowering time	BL	0.537024	0.826641	11
rice	flowering time	BRR	0.539498	0.830449	9
rice	flowering time	rrBLUP	0.417544	0.642726	18
rice	flowering time	CNN	0.444047	0.683522	17
rice	flowering time	GTB	0.513145	0.789885	13
rice	flowering time	EN5	0.583306	0.897884	4
rice	flowering time	RF	0.542147	0.834527	8
rice	flowering time	EN11	0.602385	0.927251	3
rice	flowering time	SVR	0.498717	0.767675	15
rice	flowering time	ANN_BayesB	0.573899	0.883404	5
rice	flowering time	SVRpoly	0.557925	0.858815	6
rice	flowering time	ANN_BL	0.538721	0.829254	10
rice	flowering time	SVRrbf	0.51824	0.797727	12
rice	flowering time	ANN_RF	0.551342	0.848681	7
rice	flowering time	ANN	0.50987	0.784843	14
rice	flowering time	ANN_rrBLUP	0.470003	0.723476	16
rice	height	BayesA	0.382412	0.936686	6
rice	height	SVR	0.381339	0.934057	8
rice	height	ANN_BayesB	0.319033	0.781446	15
rice	height	BayesB	0.381323	0.93402	9
rice	height	SVRpoly	0.381758	0.935084	7
rice	height	SVRrbf	0.380661	0.932398	10
rice	height	ANN_BL	0.328574	0.804815	13
rice	height	ANN	0.253411	0.620709	18
rice	height	BL	0.390639	0.956838	4
rice	height	CNN	0.316582	0.775442	16
rice	height	BRR	0.385217	0.943558	5
rice	height	EN5	0.394096	0.965305	3
rice	height	ANN_RF	0.300911	0.737057	17
rice	height	GTB	0.378428	0.926928	11
rice	height	ANN_rrBLUP	0.322993	0.791145	14
rice	height	RF	0.395603	0.968996	2
rice	height	rrBLUP	0.34287	0.839832	12
rice	height	EN11	0.408261	1	1
rice	yield	BayesA	0.365014	0.949059	6
rice	yield	ANN	0.275117	0.715321	15
rice	yield	BayesB	0.366224	0.952206	5
rice	yield	CNN	0.245574	0.638507	18
rice	yield	SVRpoly	0.33307	0.866003	10
rice	yield	BL	0.362824	0.943364	7
rice	yield	EN5	0.373402	0.970868	3
rice	yield	SVRrbf	0.288904	0.751169	12
rice	yield	BRR	0.36281	0.943329	8
rice	yield	EN11	0.384606	1	1
rice	yield	SVR	0.338293	0.879583	9
rice	yield	rrBLUP	0.271813	0.70673	16
rice	yield	ANN_BayesB	0.289631	0.753057	11
rice	yield	GTB	0.368285	0.957565	4
rice	yield	ANN_BL	0.25896	0.673313	17
rice	yield	RF	0.380064	0.988189	2
rice	yield	ANN_RF	0.284621	0.740031	13
rice	yield	ANN_rrBLUP	0.281789	0.73267	14
sorghum	height	CNN	0.553637	0.881484	18
sorghum	height	BayesA	0.627986	0.999861	2
sorghum	height	EN5	0.622626	0.991327	8
sorghum	height	BayesB	0.628073	1	1
sorghum	height	EN11	0.626764	0.997915	5
sorghum	height	BL	0.618989	0.985536	10
sorghum	height	ANN_BayesB	0.577296	0.919154	15
sorghum	height	SVRrbf	0.626153	0.996942	6
sorghum	height	SVR	0.620272	0.987578	9
sorghum	height	ANN_RF	0.59323	0.944523	11
sorghum	height	SVRpoly	0.627403	0.998933	4
sorghum	height	BRR	0.625679	0.996187	7
sorghum	height	ANN_BL	0.573719	0.913458	17
sorghum	height	ANN	0.590263	0.9398	12
sorghum	height	ANN_rrBLUP	0.577896	0.920109	14
sorghum	height	rrBLUP	0.627936	0.999782	3
sorghum	height	GTB	0.575577	0.916417	16
sorghum	height	RF	0.578728	0.921434	13
sorghum	grain moisture	BayesA	0.571667	0.998743	3
sorghum	grain moisture	BayesB	0.571548	0.998536	4
sorghum	grain moisture	BL	0.566333	0.989425	9
sorghum	grain moisture	BRR	0.570386	0.996506	5
sorghum	grain moisture	rrBLUP	0.569	0.994084	6
sorghum	grain moisture	GTB	0.538246	0.940355	11
sorghum	grain moisture	RF	0.532774	0.930795	12
sorghum	grain moisture	SVR	0.555771	0.970972	10
sorghum	grain moisture	SVRpoly	0.567479	0.991428	7
sorghum	grain moisture	SVRrbf	0.57232	0.999885	2
sorghum	grain moisture	ANN	0.512866	0.896014	15
sorghum	grain moisture	CNN	0.47165	0.824006	18
sorghum	grain moisture	EN5	0.566864	0.990352	8
sorghum	grain moisture	EN11	0.572386	1	1
sorghum	grain moisture	ANN_BayesB	0.515297	0.900261	13
sorghum	grain moisture	ANN_BL	0.513083	0.896393	14
sorghum	grain moisture	ANN_RF	0.491592	0.858847	17
sorghum	grain moisture	ANN_rrBLUP	0.506428	0.884767	16
sorghum	yield	BayesA	0.405516	0.987478	5
sorghum	yield	BayesB	0.399844	0.973665	7
sorghum	yield	CNN	0.31729	0.772638	18
sorghum	yield	BL	0.400897	0.97623	6
sorghum	yield	EN5	0.406507	0.989892	4
sorghum	yield	BRR	0.410658	1	1
sorghum	yield	EN11	0.408841	0.995574	3
sorghum	yield	ANN	0.381173	0.9282	12
sorghum	yield	rrBLUP	0.392947	0.956869	9
sorghum	yield	ANN_BayesB	0.329116	0.801435	17
sorghum	yield	SVRpoly	0.408933	0.995799	2
sorghum	yield	GTB	0.396223	0.964849	8
sorghum	yield	ANN_BL	0.355614	0.865961	15
sorghum	yield	SVRrbf	0.38335	0.9335	11
sorghum	yield	RF	0.356474	0.868055	14
sorghum	yield	ANN_RF	0.359947	0.876512	13
sorghum	yield	SVR	0.385475	0.938674	10
sorghum	yield	ANN_rrBLUP	0.346943	0.844846	16
soy	height	CNN	0.432753	0.924266	12
soy	height	EN5	0.456316	0.974591	7
soy	height	EN11	0.465163	0.993488	2
soy	height	BayesA	0.468212	1	1
soy	height	SVR	0.428491	0.915163	14
soy	height	BL	0.464028	0.991062	5
soy	height	ANN_BayesB	0.438175	0.935846	11
soy	height	SVRrbf	0.0442928	0.0945997	18
soy	height	BayesB	0.463107	0.989095	6
soy	height	ANN	0.44104	0.941966	10
soy	height	SVRpoly	0.409109	0.873768	15
soy	height	BRR	0.464436	0.991934	3
soy	height	ANN_BL	0.442251	0.944552	8
soy	height	rrBLUP	0.464333	0.991715	4
soy	height	ANN_RF	0.441676	0.943324	9
soy	height	GTB	0.397294	0.848534	16
soy	height	ANN_rrBLUP	0.429706	0.91776	13
soy	height	RF	0.359068	0.766891	17
soy	R8	BayesA	0.488837	0.992564	4
soy	R8	BayesB	0.488136	0.991141	6
soy	R8	BL	0.488147	0.991163	5
soy	R8	BRR	0.489106	0.99311	3
soy	R8	rrBLUP	0.489165	0.99323	2
soy	R8	GTB	0.455651	0.925181	12
soy	R8	RF	0.385169	0.78207	17
soy	R8	SVR	0.426006	0.864987	15
soy	R8	SVRpoly	0.417092	0.846889	16
soy	R8	SVRrbf	0.292668	0.59425	18
soy	R8	ANN	0.463638	0.941398	9
soy	R8	CNN	0.447441	0.908511	14
soy	R8	EN5	0.486209	0.987228	7
soy	R8	EN11	0.492499	1	1
soy	R8	ANN_BayesB	0.453583	0.920983	13
soy	R8	ANN_BL	0.46234	0.938764	10
soy	R8	ANN_RF	0.477884	0.970324	8
soy	R8	ANN_rrBLUP	0.460902	0.935843	11
soy	yield	BayesB	0.647382	0.995231	7
soy	yield	BL	0.648199	0.996487	3
soy	yield	BRR	0.647425	0.995298	6
soy	yield	BayesA	0.648145	0.996404	4
soy	yield	rrBLUP	0.648923	0.9976	2
soy	yield	ANN_BayesB	0.636784	0.978938	11
soy	yield	CNN	0.625517	0.961617	14
soy	yield	SVRpoly	0.603593	0.927913	17
soy	yield	GTB	0.619339	0.952121	15
soy	yield	ANN_BL	0.641166	0.985674	9
soy	yield	EN5	0.647862	0.995969	5
soy	yield	SVRrbf	0.643718	0.989599	8
soy	yield	RF	0.600675	0.923427	18
soy	yield	ANN_RF	0.638211	0.981132	10
soy	yield	EN11	0.650484	1	1
soy	yield	ANN	0.632406	0.972208	13
soy	yield	SVR	0.612265	0.941245	16
soy	yield	ANN_rrBLUP	0.633419	0.973766	12
spruce	DBH	BayesA	0.252948	0.91996	8
spruce	DBH	BayesB	0.249875	0.908784	10
spruce	DBH	BL	0.254765	0.926568	6
spruce	DBH	BRR	0.250159	0.909817	9
spruce	DBH	rrBLUP	0.242964	0.883651	11
spruce	DBH	GTB	0.253782	0.922995	7
spruce	DBH	RF	0.274955	1	1
spruce	DBH	SVR	0.123334	0.448561	18
spruce	DBH	SVRpoly	0.267055	0.971269	3
spruce	DBH	SVRrbf	0.27392	0.996237	2
spruce	DBH	ANN	0.240796	0.875765	12
spruce	DBH	CNN	0.20322	0.739104	17
spruce	DBH	EN5	0.2649	0.963429	5
spruce	DBH	EN11	0.264908	0.963461	4
spruce	DBH	ANN_BayesB	0.209114	0.76054	15
spruce	DBH	ANN_BL	0.204732	0.744601	16
spruce	DBH	ANN_RF	0.215309	0.78307	14
spruce	DBH	ANN_rrBLUP	0.222285	0.808442	13
spruce	wood density	BayesA	0.389377	0.977823	8
spruce	wood density	BayesB	0.389662	0.978541	7
spruce	wood density	BL	0.39028	0.980093	5
spruce	wood density	BRR	0.383529	0.96314	9
spruce	wood density	rrBLUP	0.390277	0.980085	6
spruce	wood density	GTB	0.359901	0.903802	14
spruce	wood density	RF	0.364083	0.914305	11
spruce	wood density	SVR	0.321251	0.806743	16
spruce	wood density	SVRpoly	0.396442	0.995567	2
spruce	wood density	SVRrbf	0.394267	0.990105	4
spruce	wood density	ANN	0.314701	0.790294	17
spruce	wood density	CNN	0.301049	0.756011	18
spruce	wood density	EN5	0.394712	0.991221	3
spruce	wood density	EN11	0.398207	1	1
spruce	wood density	ANN_BayesB	0.362727	0.9109	12
spruce	wood density	ANN_BL	0.369293	0.927389	10
spruce	wood density	ANN_RF	0.360921	0.906364	13
spruce	wood density	ANN_rrBLUP	0.329627	0.827778	15
spruce	height	rrBLUP	0.324538	0.938431	7
spruce	height	EN11	0.335247	0.969399	4
spruce	height	CNN	0.260889	0.754386	17
spruce	height	BayesA	0.323612	0.935754	9
spruce	height	EN5	0.33908	0.980481	3
spruce	height	BayesB	0.319882	0.92497	11
spruce	height	GTB	0.328538	0.949999	6
spruce	height	ANN_BayesB	0.289042	0.835791	12
spruce	height	RF	0.34583	1	1
spruce	height	ANN_BL	0.268084	0.775189	16
spruce	height	SVR	0.188619	0.54541	18
spruce	height	BL	0.324311	0.937776	8
spruce	height	SVRpoly	0.331887	0.959681	5
spruce	height	SVRrbf	0.34391	0.994449	2
spruce	height	ANN_RF	0.277022	0.801035	14
spruce	height	BRR	0.321707	0.930247	10
spruce	height	ANN	0.277068	0.801168	13
spruce	height	ANN_rrBLUP	0.276551	0.799674	15
switchgrass	anthesis date	BayesA	0.852144	0.996682	2
switchgrass	anthesis date	BayesB	0.851114	0.995478	5
switchgrass	anthesis date	BL	0.839888	0.982348	8
switchgrass	anthesis date	BRR	0.851314	0.995711	4
switchgrass	anthesis date	rrBLUP	0.854981	1	1
switchgrass	anthesis date	GTB	0.815173	0.95344	16
switchgrass	anthesis date	RF	0.804195	0.940601	17
switchgrass	anthesis date	SVR	0.839505	0.981899	9
switchgrass	anthesis date	SVRpoly	0.846438	0.990008	6
switchgrass	anthesis date	SVRrbf	0.851899	0.996396	3
switchgrass	anthesis date	ANN	0.664659	0.777397	18
switchgrass	anthesis date	CNN	0.829706	0.970439	11
switchgrass	anthesis date	EN5	0.829568	0.970277	12
switchgrass	anthesis date	EN11	0.842534	0.985443	7
switchgrass	anthesis date	ANN_BayesB	0.815959	0.95436	15
switchgrass	anthesis date	ANN_BL	0.817664	0.956354	14
switchgrass	anthesis date	ANN_RF	0.825213	0.965183	13
switchgrass	anthesis date	ANN_rrBLUP	0.836686	0.978603	10
switchgrass	height	rrBLUP	0.607835	0.989137	3
switchgrass	height	CNN	0.578907	0.942061	12
switchgrass	height	EN5	0.598132	0.973346	10
switchgrass	height	GTB	0.564884	0.919241	16
switchgrass	height	RF	0.566307	0.921557	13
switchgrass	height	ANN_BL	0.547164	0.890406	17
switchgrass	height	EN11	0.604923	0.984398	7
switchgrass	height	BL	0.606031	0.9862	6
switchgrass	height	BayesA	0.607836	0.989138	2
switchgrass	height	SVRrbf	0.598921	0.974631	9
switchgrass	height	SVR	0.60063	0.977411	8
switchgrass	height	ANN_RF	0.58822	0.957216	11
switchgrass	height	ANN_BayesB	0.565364	0.920023	15
switchgrass	height	BRR	0.606978	0.987741	5
switchgrass	height	BayesB	0.607218	0.988132	4
switchgrass	height	ANN	0.528254	0.859633	18
switchgrass	height	SVRpoly	0.614511	1	1
switchgrass	height	ANN_rrBLUP	0.566135	0.921278	14
switchgrass	standability	BayesA	0.691385	0.99735	3
switchgrass	standability	BayesB	0.690811	0.996523	4
switchgrass	standability	BL	0.686031	0.989627	8
switchgrass	standability	BRR	0.690356	0.995866	6
switchgrass	standability	rrBLUP	0.692034	0.998287	2
switchgrass	standability	GTB	0.662981	0.956377	11
switchgrass	standability	RF	0.648582	0.935605	16
switchgrass	standability	SVR	0.679476	0.980172	9
switchgrass	standability	SVRpoly	0.690515	0.996095	5
switchgrass	standability	SVRrbf	0.693222	1	1
switchgrass	standability	ANN	0.551495	0.795554	18
switchgrass	standability	CNN	0.650962	0.939039	15
switchgrass	standability	EN5	0.677576	0.97743	10
switchgrass	standability	EN11	0.687214	0.991335	7
switchgrass	standability	ANN_BayesB	0.662722	0.956003	12
switchgrass	standability	ANN_BL	0.641899	0.925966	17
switchgrass	standability	ANN_RF	0.651222	0.939414	14
switchgrass	standability	ANN_rrBLUP	0.65172	0.940132	13
DBH: Diameter at Breast Height
rrBLUP: ridge regression Best Linear Unbiased Predictor
BRR: Bayesian Ridge Regression
BL: Bayesian LASSO
SVR: Support Vector Regression
poly: polynomial
rbf: radial basis function
RF: Random Forest
GTB: Gradient Tree Boosting
ANN: Artificial Neural Network
CNN: Convolutional Neural Network

## Sheet: S6
Table S6. Summary of GP algorithm performance across benchmark analysis
Algorithm	# Wins	Median Rank	% Best (median)	% Best (variance)
EN11	10	3	0.992411	0.000341201
BRR	9	5	0.990654	0.00194265
BayesA	8	4.5	0.988308	0.000689665
rrBLUP	7	5.5	0.987886	0.0110858
BayesB	8	6	0.984473	0.000762273
BL	5	6	0.983175	0.0016632
EN5	6	4.5	0.980863	0.000527926
SVRpoly	8	6	0.968999	0.00287538
SVRrbf	5	9.5	0.954065	0.0496492
SVR	0	10	0.936366	0.0230309
RF	3	12.5	0.928019	0.00440682
GTB	0	13.5	0.926054	0.00237236
ANN_BayesB	0	13	0.912874	0.00511357
ANN_BL	0	14	0.903686	0.00681411
CNN	0	15.5	0.87213	0.0105902
ANN_rrB	0	14	0.891915	0.00610647
ANN_RF	0	13	0.891438	0.00640177
ANN	0	13.5	0.87835	0.0088258
