# Supplementary material
Source: publisher figshare collection journal article supplement (https://gsajournals.figshare.com/articles/dataset/_/9855590)

Figure S1

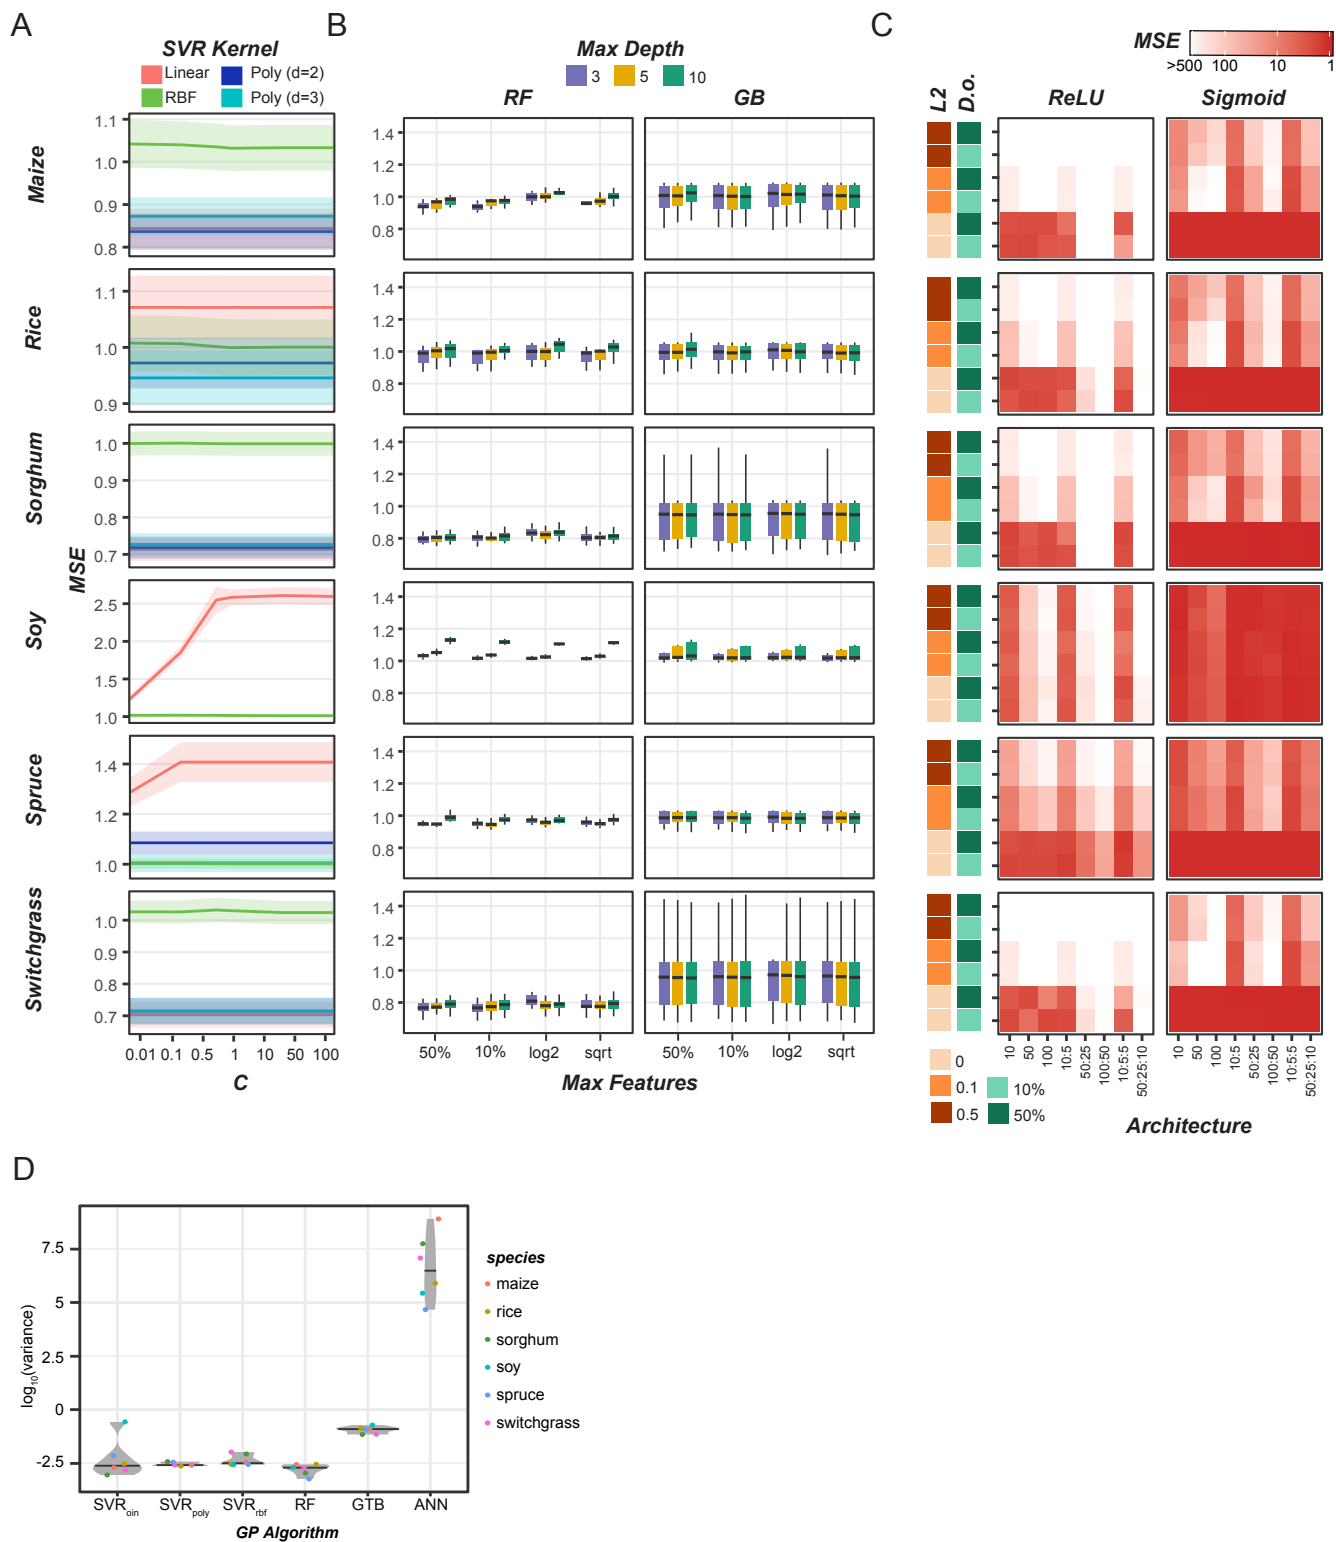

Figure S2

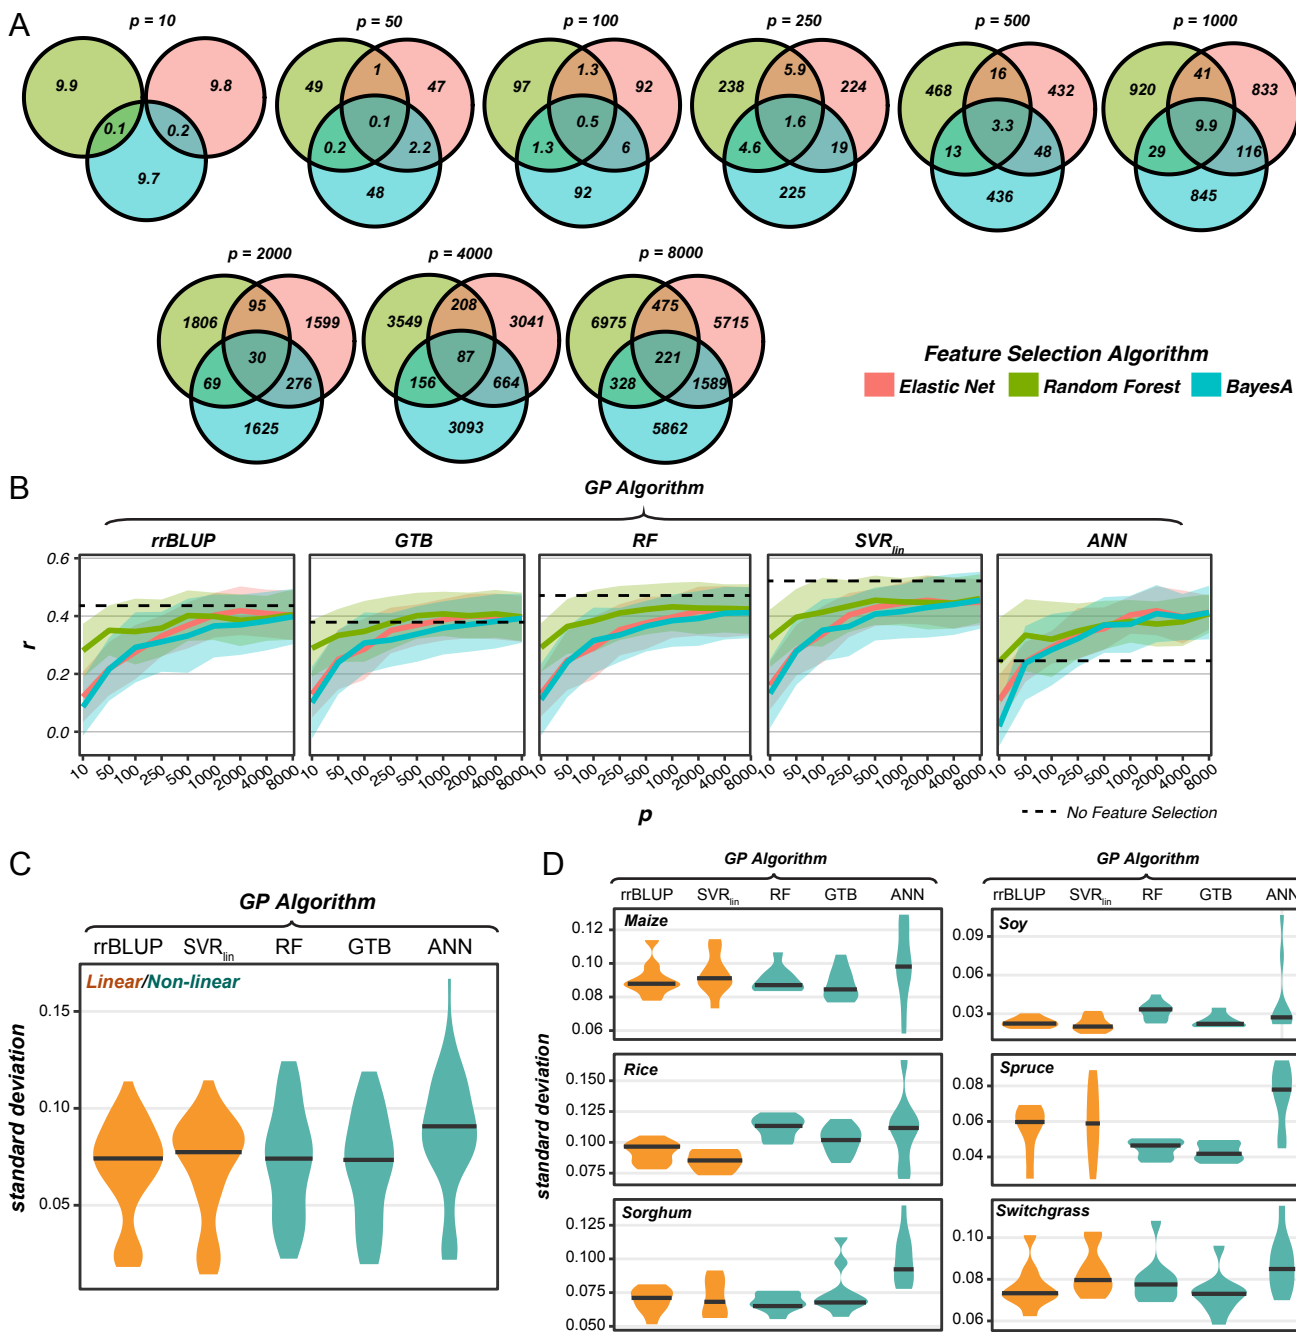

Figure S3

A

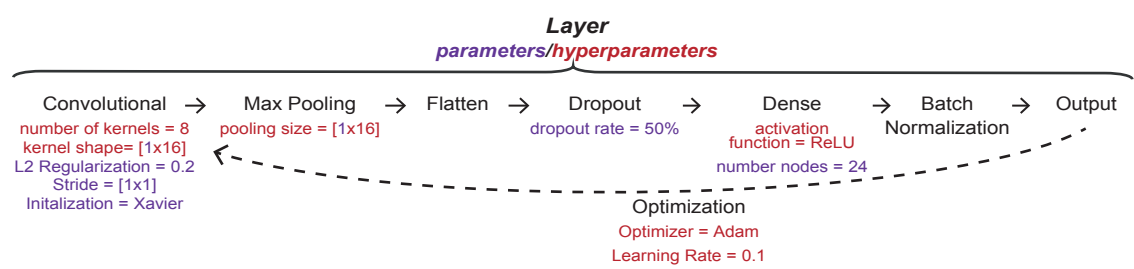

B

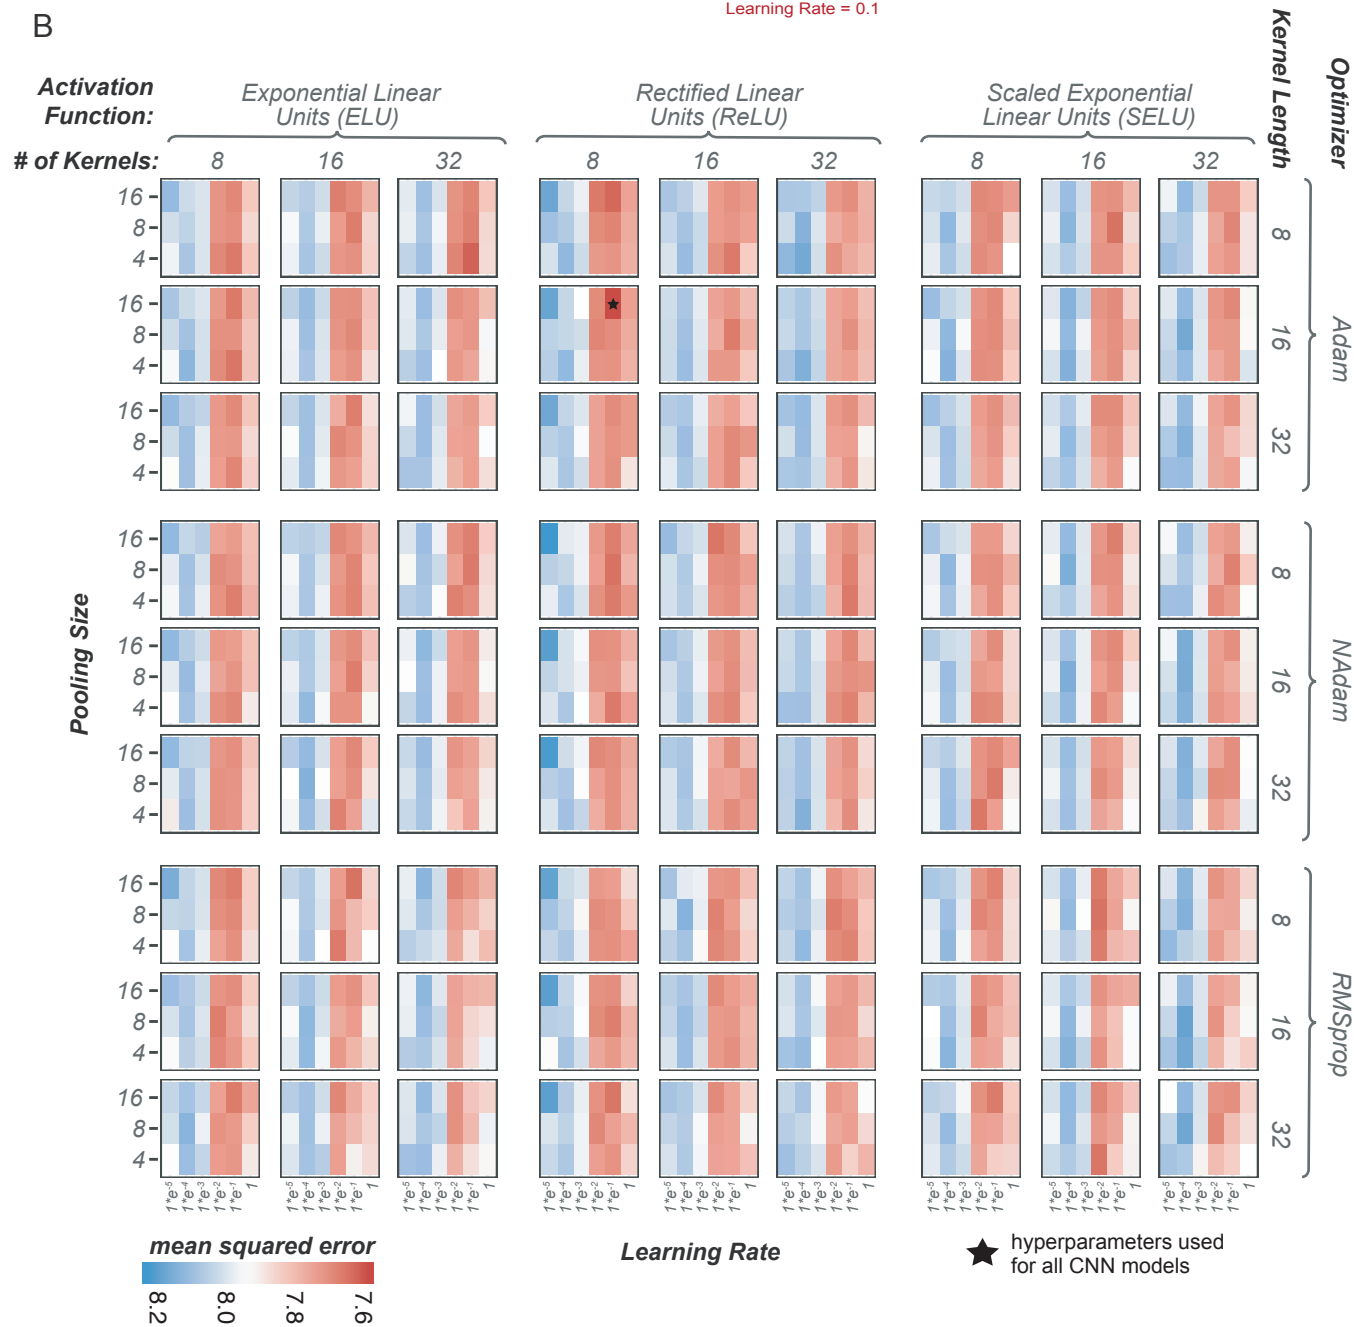

Figure S4

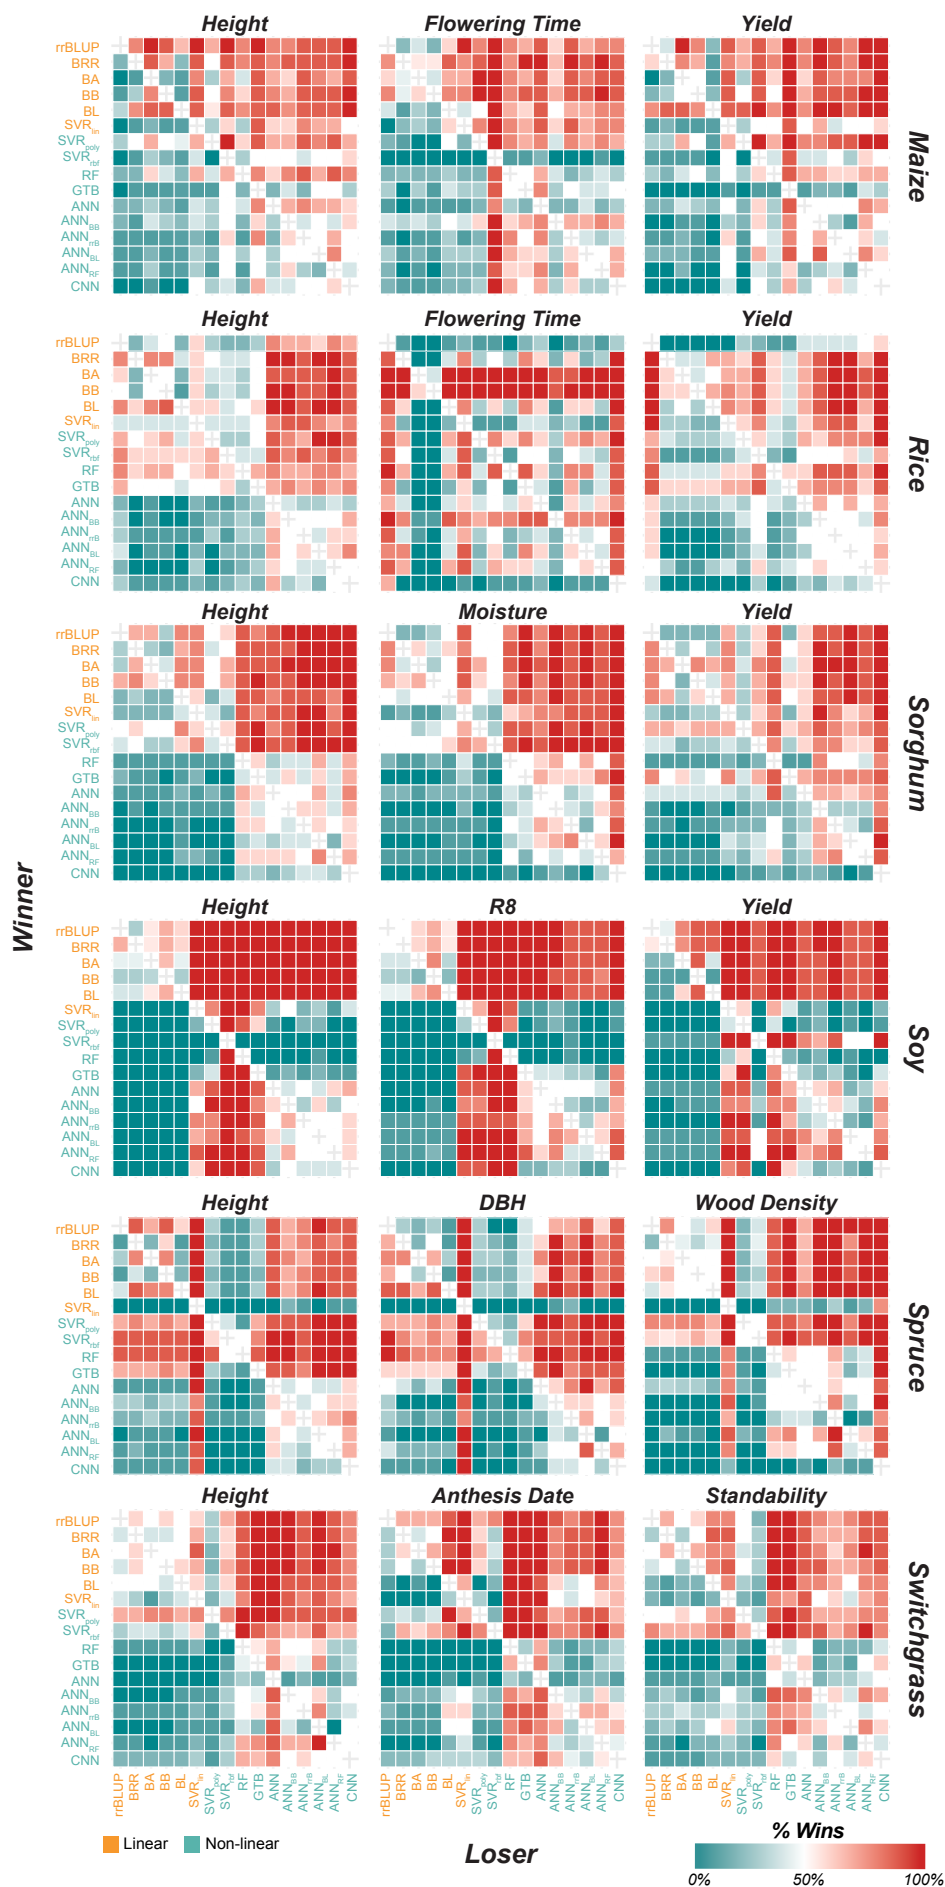

Figure S5

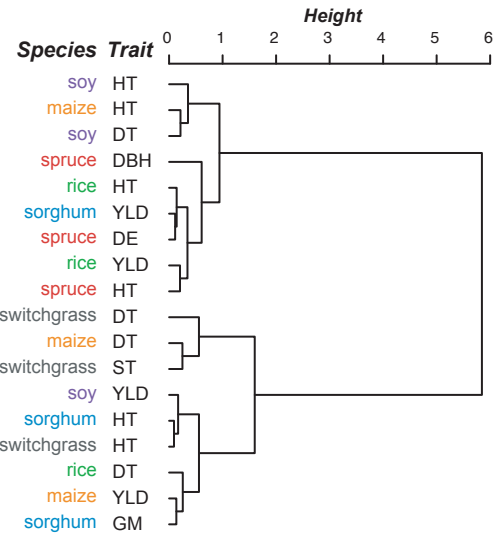

Supplement: Supplementary file 1 [file 1]
